# Supplementary material for: Association of women-specific health factors in the severity of Parkinson’s disease
Source: PubMed Central journal article supplement (PMC10241917; doi:10.1038/s41531-023-00524-x), 2023-06-05
Supplement: 41531_2023_524_MOESM1_ESM.pdf [file 41531_2023_524_MOESM1_ESM.pdf]

Supplemental Table 1A. Part I: Univariate Logistic Regression Results

|                                               | Sample Size | OR (95% CI)          | p-value      |
|-----------------------------------------------|-------------|----------------------|--------------|
| <b>Age</b>                                    |             |                      |              |
|                                               | 160         | 1.01 (0.97, 1.05)    | 0.6          |
| <b>Hispanic</b>                               |             |                      |              |
|                                               | 160         | 0.32 (0.01, 10.05)   | 0.52         |
| <b>White</b>                                  |             |                      |              |
|                                               | 160         | 2.20 (0.25, 19.32)   | 0.48         |
| <b>Genetic Status</b>                         | 158         |                      |              |
| GBA                                           |             | 0.31 (0.05, 1.83)    | 0.2          |
| LRRK2                                         |             | 0.63 (0.11, 3.71)    | 0.61         |
| GBA                                           | 160         | 0.69 (0.21, 2.24)    | 0.54         |
| LRRK2                                         | 160         | 1.51 (0.47, 4.88)    | 0.49         |
| PRKN                                          | 160         | 5.00 (0.88, 28.29)   | 0.069        |
| None                                          |             | 0.41 (0.10, 1.74)    | 0.23         |
| Other                                         |             | -reference-          |              |
| <b>Medications</b>                            |             |                      |              |
| Levodopa                                      | 160         | 1.66 (0.74, 3.70)    | 0.22         |
| <i>Entacapone</i>                             | 159         | 17.14 (0.55, 533.12) | 0.11         |
| Carbidopa, Levodopa, and Entacapone (Stalevo) | 158         | 2.56 (0.78, 8.40)    | 0.12         |
| Pramipexole                                   | 158         | 1.42 (0.55, 3.66)    | 0.47         |
| Ropinirole                                    | 158         | 4.68 (1.30, 16.85)   | <b>0.018</b> |
| Rotigotine                                    | 158         | 1.19 (0.21, 6.72)    | 0.84         |
| Rasagiline                                    | 158         | 0.71 (0.29, 1.70)    | 0.44         |
| Selegiline (oral, sublingual)                 | 159         | 1.16 (0.10, 13.10)   | 0.9          |
| Amantadine (liquid, infusion)                 | 158         | 0.47 (0.13, 1.73)    | 0.26         |
| <b>Current Comorbidities</b>                  |             |                      |              |
| Arrhythmia/Atrial Fibrillation                | 160         | 1.00 (0.25, 4.04)    | 0.99         |

|                                                           |     |                      |                  |
|-----------------------------------------------------------|-----|----------------------|------------------|
| Arthritis                                                 | 160 | 1.96 (0.97, 3.94)    | 0.059            |
| B12 deficiency                                            | 160 | 1.95 (0.68, 5.60)    | 0.21             |
| Cancer                                                    | 160 | 1.17 (0.21, 6.64)    | 0.86             |
| Depression                                                | 160 | 6.17 (2.89, 13.19)   | <b>&lt;0.001</b> |
| Diabetes Mellitus (adult onset)                           | 160 | 2.42 (0.47, 12.45)   | 0.29             |
| Hearing Loss                                              | 160 | 1.94 (0.91, 4.12)    | 0.087            |
| Hyper cholesterolemia (High Cholesterol)                  | 160 | 1.50 (0.72, 3.13)    | 0.28             |
| Hypertension (High Blood Pressure)                        | 160 | 0.82 (0.34, 1.99)    | 0.66             |
| Loss of smell                                             | 160 | 0.84 (0.42, 1.68)    | 0.63             |
| Lung disease (including emphysema)                        | 160 | 2.05 (0.60, 7.09)    | 0.25             |
| Other                                                     | 160 | 2.11 (1.06, 4.21)    | <b>0.034</b>     |
| Peripheral neuropathy                                     | 160 | 0.69 (0.21, 2.24)    | 0.54             |
| PTSD                                                      | 160 | 5.19 (1.24, 21.71)   | <b>0.024</b>     |
| Recreational drug use                                     | 160 | 1.18 (0.28, 4.92)    | 0.82             |
| Renal insufficiency (kidney disease)                      | 160 | 2.39 (0.33, 17.49)   | 0.39             |
| Thyroid disease (not cancer, including Grave's disease)   | 160 | 1.53 (0.68, 3.46)    | 0.3              |
| <b>Still Menstruating Variable</b>                        |     |                      |                  |
|                                                           | 160 | 1.07 (0.35, 3.26)    | 0.91             |
| <b>Diagnosis of PMS Variable</b>                          |     |                      |                  |
|                                                           | 160 | 1.86 (0.61, 5.68)    | 0.28             |
| <b>Currently Perimenopausal Variable</b>                  |     |                      |                  |
|                                                           | 156 | 0.96 (0.24, 3.89)    | 0.96             |
| <b>Hormone Levels Checked for Perimenopausal Variable</b> |     |                      |                  |
|                                                           | 10  | 15.40 (0.41, 584.08) | 0.14             |
| <b>Have Experienced Menopause Variable</b>                |     |                      |                  |
|                                                           | 157 | 1.21 (0.44, 3.28)    | 0.71             |
| <b>Menses and PD Medication</b>                           |     |                      |                  |
| Medication felt less effective                            | 160 | 10.09 (1.10, 92.81)  | <b>0.041</b>     |

|                                                                                                      |     |                    |       |
|------------------------------------------------------------------------------------------------------|-----|--------------------|-------|
| More off/irregular frequency periods                                                                 | 160 | 5.00 (0.88, 28.29) | 0.069 |
| <b>Hormone Replacement Therapy Variable</b>                                                          |     |                    |       |
|                                                                                                      | 152 | 1.48 (0.69, 3.15)  | 0.31  |
| <b>Birth Control Variable</b>                                                                        |     |                    |       |
|                                                                                                      | 110 | 0.68 (0.07, 6.74)  | 0.74  |
| <b>Experience of Breast Feeding</b>                                                                  |     |                    |       |
|                                                                                                      | 159 |                    |       |
| Yes                                                                                                  |     | 1.62 (0.64, 4.12)  | 0.31  |
| No                                                                                                   |     | 1.60 (0.47, 5.47)  | 0.45  |
| N/A                                                                                                  |     | -reference-        |       |
| <b>PD Onset</b>                                                                                      |     |                    |       |
|                                                                                                      | 157 |                    |       |
| While I was still having regular periods                                                             |     | -reference-        |       |
| While I was going through perimenopause                                                              |     | 1.58 (0.42, 5.94)  | 0.5   |
| One year or more after my last menstrual period                                                      |     | 1.00 (0.40, 2.50)  | 0.99  |
| <b>History of Surgeries</b>                                                                          |     |                    |       |
| Total hysterectomy (removal of uterus, cervix, ovaries, Fallopian tubes, and surrounding structures) | 160 | 1.58 (0.66, 3.79)  | 0.31  |
| Oophorectomy (surgical removal of one/unilateral or both/bilateral ovaries)                          | 160 | 1.86 (0.61, 5.68)  | 0.28  |
| Mastectomy                                                                                           | 160 | 0.46 (0.05, 4.00)  | 0.48  |
| Partial hysterectomy (just uterus)                                                                   | 160 | 1.51 (0.47, 4.88)  | 0.49  |
| <b>Types of Hormone Replacement Therapy</b>                                                          |     |                    |       |
| Estrogen                                                                                             | 160 | 1.74 (0.62, 4.89)  | 0.29  |
| Progesterone/Progestin                                                                               | 160 | 1.58 (0.26, 9.77)  | 0.62  |
| Estrogen and progesterone combination                                                                | 160 | 1.00 (0.36, 2.78)  | 0.99  |
| <b>Types of Birth Control</b>                                                                        |     |                    |       |
| Pill                                                                                                 | 160 | 1.66 (0.76, 3.62)  | 0.2   |
| Ring                                                                                                 | 160 | 0.57 (0.06, 5.28)  | 0.62  |
| Hormonal IUD                                                                                         | 160 | 0.76 (0.20, 2.95)  | 0.7   |
| Copper IUD                                                                                           | 160 | 1.46 (0.50, 4.27)  | 0.49  |

|                                              |     |                      |              |
|----------------------------------------------|-----|----------------------|--------------|
| Tubal ligation                               | 160 | 4.33 (1.64, 11.45)   | <b>0.003</b> |
| <b>Pregnancy Experiences</b>                 |     |                      |              |
| <i>In vitro fertilization</i>                | 160 | 0.25 (0.01, 6.63)    | 0.41         |
| C-section                                    | 160 | 0.55 (0.21, 1.46)    | 0.23         |
| Vaginal birth                                | 160 | 3.48 (1.49, 8.13)    | <b>0.004</b> |
| Having children prior to PD diagnosis        | 160 | 3.44 (1.25, 9.47)    | <b>0.017</b> |
| No children                                  | 160 | 0.35 (0.11, 1.08)    | 0.068        |
| <b>Difficulties in Pregnancy Experiences</b> |     |                      |              |
| Conceiving (fertility)                       | 160 | 1.76 (0.70, 4.44)    | 0.23         |
| Childbirth                                   | 160 | 3.03 (1.19, 7.73)    | <b>0.02</b>  |
| Pregnancy (reaching full birth)              | 160 | 1.40 (0.55, 3.60)    | 0.48         |
| <b>Pregnancy-related Aliments</b>            |     |                      |              |
| Eclampsia or pre-eclampsia                   | 160 | 0.57 (0.12, 2.77)    | 0.48         |
| <i>Diabetes during pregnancy</i>             | 160 | 28.47 (1.17, 692.41) | <b>0.04</b>  |
| <i>Viral infection</i>                       | 160 | 7.02 (0.08, 647.52)  | 0.4          |
| Bacterial infection                          | 160 | 5.00 (0.88, 28.29)   | 0.069        |
| Depression/anxiety during pregnancy          | 160 | 22.20 (2.69, 183.12) | <b>0.004</b> |
| Postpartum Depression                        | 160 | 6.36 (2.07, 19.52)   | <b>0.001</b> |
| Flair up migraines                           | 160 | 3.02 (0.96, 9.51)    | 0.06         |
| <b>Hormone-related Disorders</b>             |     |                      |              |
| Polycystic Ovarian Syndrome                  | 160 | 3.30 (0.71, 15.37)   | 0.13         |
| Hypothyroidism                               | 160 | 1.12 (0.45, 2.80)    | 0.81         |
| Hyperthyroidism                              | 160 | 0.57 (0.12, 2.77)    | 0.48         |
| Diabetes Type II                             | 160 | 0.93 (0.17, 4.97)    | 0.93         |
| Migraines (no aura)                          | 160 | 2.12 (0.82, 5.51)    | 0.12         |

*Variables in italics*: use Firth method

Dummy variables for each response option

Reference was used to for univariate modeling and for the outcome of moderate/severe phenotype

Supplemental Table 1B. Part II: Univariate Logistic Regression Results

|                                               | Sample Size | OR (95% CI)         | p-value      |
|-----------------------------------------------|-------------|---------------------|--------------|
| <b>Age</b>                                    | 302         | 1.02 (0.98, 1.05)   | 0.33         |
| <b>Hispanic</b>                               | 300         | 0.72 (0.09, 6.11)   | 0.76         |
| <b>White</b>                                  | 299         | 6.62 (0.35, 125.61) | 0.21         |
| <b>Genetic Status</b>                         | 299         |                     |              |
| GBA                                           |             | 1.07 (0.26, 4.31)   | 0.93         |
| LRRK2                                         |             | 0.50 (0.10, 2.58)   | 0.41         |
| GBA                                           | 302         | 1.39 (0.56, 3.41)   | 0.48         |
| LRRK2                                         | 302         | 0.61 (0.17, 2.11)   | 0.43         |
| PRKN                                          | 302         | 1.68 (0.43, 6.56)   | 0.45         |
| None                                          |             | 0.80 (0.25, 2.54)   | 0.7          |
| Other                                         |             | -reference-         |              |
| <b>Medications</b>                            |             |                     |              |
| Levodopa                                      | 302         | 2.20 (1.03, 4.73)   | <b>0.043</b> |
| Entacapone                                    | 300         | 1.77 (0.33, 9.37)   | 0.5          |
| Carbidopa, Levodopa, and Entacapone (Stalevo) | 299         | 1.96 (0.72, 5.36)   | 0.19         |
| Pramipexole                                   | 299         | 1.30 (0.53, 3.20)   | 0.56         |
| Ropinirole                                    | 299         | 2.72 (1.13, 6.52)   | <b>0.025</b> |
| Rotigotine                                    | 299         | 3.31 (1.01, 10.83)  | <b>0.048</b> |
| Rasagiline                                    | 299         | 0.52 (0.23, 1.16)   | 0.11         |
| Selegiline (oral, sublingual)                 | 300         | 0.30 (0.04, 2.32)   | 0.25         |
| Amantadine (liquid, infusion)                 | 299         | 2.09 (0.99, 4.43)   | 0.053        |
| <b>Current Comorbidities</b>                  |             |                     |              |
| Arrhythmia/Atrial Fibrillation                | 302         | 1.24 (0.44, 3.50)   | 0.68         |
| Arthritis                                     | 302         | 1.06 (0.59, 1.89)   | 0.85         |

|                                                           |     |                    |                  |
|-----------------------------------------------------------|-----|--------------------|------------------|
| B12 deficiency                                            | 302 | 1.00 (0.36, 2.76)  | 0.99             |
| Cancer                                                    | 302 | 1.62 (0.56, 4.71)  | 0.37             |
| Depression                                                | 302 | 2.94 (1.61, 5.38)  | <b>&lt;0.001</b> |
| Diabetes Mellitus (adult onset)                           | 302 | 0.87 (0.19, 4.10)  | 0.86             |
| Hearing Loss                                              | 302 | 1.76 (0.95, 3.27)  | 0.074            |
| Hyper cholesterolemia (High Cholesterol)                  | 302 | 0.63 (0.32, 1.27)  | 0.2              |
| Hypertension (High Blood Pressure)                        | 302 | 1.27 (0.65, 2.47)  | 0.48             |
| Loss of smell                                             | 302 | 1.93 (1.08, 3.47)  | <b>0.027</b>     |
| Lung disease (including emphysema)                        | 302 | 1.51 (0.53, 4.34)  | 0.44             |
| Other                                                     | 302 | 0.97 (0.53, 1.79)  | 0.93             |
| Peripheral neuropathy                                     | 302 | 2.93 (1.38, 6.23)  | <b>0.005</b>     |
| PTSD                                                      | 302 | 1.50 (0.47, 4.84)  | 0.5              |
| Recreational drug use                                     | 302 | 0.66 (0.15, 3.03)  | 0.6              |
| Renal insufficiency (kidney disease)                      | 302 | 3.43 (0.74, 15.76) | 0.11             |
| Thyroid disease (not cancer, including Grave's disease)   | 302 | 1.25 (0.62, 2.50)  | 0.53             |
| <b>Still Menstruating Variable</b>                        |     |                    |                  |
|                                                           | 301 | 0.17 (0.02, 1.26)  | 0.083            |
| <b>Diagnosis of PMS Variable</b>                          |     |                    |                  |
|                                                           | 301 | 1.20 (0.49, 2.93)  | 0.68             |
| <b>Currently Perimenopausal Variable</b>                  |     |                    |                  |
|                                                           | 294 | 0.53 (0.12, 2.36)  | 0.4              |
| <b>Hormone Levels Checked for Perimenopausal Variable</b> |     |                    |                  |
|                                                           | 18  | 1.29 (0.07, 24.38) | 0.87             |
| <b>Have Experienced Menopause Variable</b>                |     |                    |                  |
|                                                           | 298 | 9.09 (1.22, 67.83) | <b>0.031</b>     |
| <b>Menses and PD Medication</b>                           |     |                    |                  |
| Medication felt less effective                            | 302 | 4.65 (1.13, 19.21) | <b>0.034</b>     |
| More off/irregular frequency periods                      | 302 | 3.08 (0.84, 11.29) | 0.09             |

**Hormone Replacement Therapy Variable**

288 1.36 (0.73, 2.55) 0.33

**Birth Control Variable**

202 0.55 (0.07, 4.50) 0.57

**Experience of Breast Feeding**

296

Yes

0.86 (0.40, 1.84)

0.7

No

1.26 (0.49, 3.23)

0.63

N/A

-reference-

**PD Onset**

296

While I was still having regular periods

-reference-

While I was going through perimenopause

0.90 (0.30, 2.72)

0.85

One year or more after my last menstrual period

0.59 (0.29, 1.22)

0.16

**History of Surgeries**

Total hysterectomy (removal of uterus, cervix, ovaries, Fallopian tubes, and surrounding structures)

302

1.59 (0.77, 3.30)

0.21

Oophorectomy (surgical removal of one/unilateral or both/bilateral ovaries)

302

0.58 (0.17, 2.00)

0.38

Mastectomy

302

5.93 (1.54, 22.85)

**0.01**

Partial hysterectomy (just uterus)

302

0.58 (0.19, 1.71)

0.32

**Types of Hormone Replacement Therapy**

Estrogen

302

1.25 (0.54, 2.90)

0.61

Progesterone/Progestin

302

1.10 (0.23, 5.34)

0.9

Estrogen and progesterone combination

302

1.98 (0.92, 4.29)

0.082

**Types of Birth Control**

Pill

302

0.89 (0.48, 1.64)

0.7

Ring

302

1.48 (0.29, 7.54)

0.64

Hormonal IUD

302

1.27 (0.40, 4.03)

0.68

Copper IUD

302

0.73 (0.27, 1.99)

0.54

Tubal ligation

302

1.11 (0.46, 2.69)

0.81

**Pregnancy Experiences**

|                                              |     |                    |              |
|----------------------------------------------|-----|--------------------|--------------|
| <i>In vitro fertilization</i>                | 302 | 0.33 (0.01, 7.42)  | 0.48         |
| C-section                                    | 302 | 1.01 (0.49, 2.09)  | 0.98         |
| Vaginal birth                                | 302 | 1.13 (0.62, 2.07)  | 0.69         |
| Having children prior to PD diagnosis        | 302 | 0.96 (0.50, 1.85)  | 0.91         |
| No children                                  | 302 | 0.93 (0.45, 1.94)  | 0.86         |
| <b>Difficulties in Pregnancy Experiences</b> |     |                    |              |
| Conceiving (fertility)                       | 302 | 0.89 (0.37, 2.13)  | 0.79         |
| Childbirth                                   | 302 | 1.16 (0.48, 2.81)  | 0.74         |
| Pregnancy (reaching full birth)              | 302 | 1.06 (0.41, 2.72)  | 0.9          |
| <b>Pregnancy-related Aliments</b>            |     |                    |              |
| Eclampsia or pre-eclampsia                   | 302 | 0.30 (0.04, 2.34)  | 0.25         |
| Diabetes during pregnancy                    | 302 | 0.73 (0.09, 6.16)  | 0.77         |
| Viral infection                              | 302 | 2.24 (0.40, 12.55) | 0.36         |
| Bacterial infection                          | 302 | 2.63 (0.74, 9.30)  | 0.13         |
| Depression/anxiety during pregnancy          | 302 | 5.78 (1.70, 19.69) | <b>0.005</b> |
| Postpartum Depression                        | 302 | 2.11 (0.87, 5.14)  | 0.1          |
| Flair up migraines                           | 302 | 2.56 (0.97, 6.75)  | 0.057        |
| <b>Hormone-related Disorders</b>             |     |                    |              |
| Polycystic Ovarian Syndrome                  | 302 | 1.91 (0.65, 5.67)  | 0.24         |
| Hypothyroidism                               | 302 | 1.00 (0.47, 2.13)  | 0.99         |
| Hyperthyroidism                              | 302 | 0.81 (0.23, 2.89)  | 0.75         |
| Diabetes Type II                             | 302 | 0.66 (0.15, 3.03)  | 0.6          |
| Migraines (no aura)                          | 302 | 1.69 (0.77, 3.73)  | 0.19         |

*Variables in italics:* use Firth method

Dummy variables for each response option

Reference was used to for univariate modeling and for the outcome of moderate/severe phenotype



Supplemental Table 1C. Part III: Univariate Logistic Regression Results

|                                               | Sample Size | OR (95% CI)        | p-value     |
|-----------------------------------------------|-------------|--------------------|-------------|
| <b>Age</b>                                    |             |                    |             |
|                                               | 141         | 1.01 (0.96, 1.06)  | 0.72        |
| <b>Hispanic</b>                               |             |                    |             |
|                                               | 141         | 0.58 (0.02, 18.20) | 0.76        |
| <b>White</b>                                  |             |                    |             |
|                                               | 141         | 0.70 (0.07, 7.03)  | 0.76        |
| <b>Genetic Status</b>                         | 139         |                    |             |
| GBA                                           |             | 1.20 (0.17, 8.66)  | 0.86        |
| LRRK2                                         |             | 2.50 (0.34, 18.33) | 0.37        |
| GBA                                           | 141         | 1.81 (0.52, 6.28)  | 0.35        |
| LRRK2                                         | 141         | 4.09 (1.15, 14.60) | <b>0.03</b> |
| PRKN                                          | 141         | 2.20 (0.38, 12.69) | 0.38        |
| None                                          |             | 0.53 (0.10, 2.88)  | 0.47        |
| Other                                         |             | -reference-        |             |
| <b>Medications</b>                            |             |                    |             |
| Levodopa                                      | 141         | 0.68 (0.28, 1.69)  | 0.41        |
| Entacapone                                    | 140         | 2.13 (0.19, 24.45) | 0.54        |
| Carbidopa, Levodopa, and Entacapone (Stalevo) | 139         | 1.04 (0.21, 5.20)  | 0.96        |
| Pramipexole                                   | 139         | 1.59 (0.52, 4.88)  | 0.42        |
| Ropinirole                                    | 139         | 0.44 (0.05, 3.63)  | 0.45        |
| Rotigotine                                    | 139         | 6.87 (1.09, 43.41) | <b>0.04</b> |
| Rasagiline                                    | 139         | 0.83 (0.29, 2.43)  | 0.74        |
| <i>Selegiline (oral, sublingual)</i>          | 140         | 0.57 (0.02, 18.04) | 0.75        |
| Amantadine (liquid, infusion)                 | 139         | 1.77 (0.51, 6.16)  | 0.37        |
| <b>Current Comorbidities</b>                  |             |                    |             |
| Arrythmia/Atrial Fibrillation                 | 141         | 0.51 (0.06, 4.26)  | 0.53        |
| Arthritis                                     | 141         | 0.54 (0.23, 1.26)  | 0.15        |

|                                                           |     |                    |              |
|-----------------------------------------------------------|-----|--------------------|--------------|
| B12 deficiency                                            | 141 | 4.64 (1.51, 14.23) | <b>0.007</b> |
| Cancer                                                    | 141 | 1.06 (0.11, 9.87)  | 0.96         |
| Depression                                                | 141 | 1.40 (0.57, 3.45)  | 0.46         |
| Diabetes Mellitus (adult onset)                           | 141 | 2.20 (0.38, 12.69) | 0.38         |
| Hearing Loss                                              | 141 | 0.84 (0.31, 2.28)  | 0.73         |
| Hyper cholesterolemia (High Cholesterol)                  | 141 | 0.90 (0.35, 2.33)  | 0.82         |
| Hypertension (High Blood Pressure)                        | 141 | 1.27 (0.45, 3.52)  | 0.65         |
| Loss of smell                                             | 141 | 1.65 (0.71, 3.84)  | 0.24         |
| Lung disease (including emphysema)                        | 141 | 2.25 (0.53, 9.64)  | 0.27         |
| Other                                                     | 141 | 0.41 (0.15, 1.09)  | 0.073        |
| Peripheral neuropathy                                     | 141 | 0.75 (0.16, 3.60)  | 0.72         |
| PTSD                                                      | 141 | 2.73 (0.61, 12.19) | 0.19         |
| Recreational drug use                                     | 141 | 0.59 (0.07, 4.99)  | 0.63         |
| <i>Renal insufficiency (kidney disease)</i>               | 141 | 0.58 (0.02, 18.20) | 0.76         |
| Thyroid disease (not cancer, including Grave's disease)   | 141 | 0.65 (0.21, 2.07)  | 0.47         |
| <b>Still Menstruating Variable</b>                        |     |                    |              |
|                                                           | 141 | 1.06 (0.28, 4.06)  | 0.93         |
| <b>Diagnosis of PMS Variable</b>                          |     |                    |              |
|                                                           | 141 | 1.46 (0.37, 5.80)  | 0.59         |
| <b>Currently Perimenopausal Variable</b>                  |     |                    |              |
|                                                           | 137 | 0.18 (0.01, 3.69)  | 0.27         |
| <b>Hormone Levels Checked for Perimenopausal Variable</b> |     |                    |              |
| <b>Have Experienced Menopause Variable</b>                |     |                    |              |
|                                                           | 138 | 0.70 (0.23, 2.12)  | 0.53         |
| <b>Menses and PD Medication</b>                           |     |                    |              |
| Medication felt less effective                            | 141 | 2.15 (0.19, 24.66) | 0.54         |
| More off/irregular frequency periods                      | 141 | 1.06 (0.11, 9.87)  | 0.96         |
| <b>Hormone Replacement Therapy Variable</b>               |     |                    |              |

|                                                                                                      |     |                    |              |
|------------------------------------------------------------------------------------------------------|-----|--------------------|--------------|
|                                                                                                      | 133 | 1.97 (0.81, 4.79)  | 0.13         |
| <b>Birth Control Variable</b>                                                                        |     |                    |              |
|                                                                                                      | 100 | 0.41 (0.02, 11.28) | 0.6          |
| <b>Experience of Breast Feeding</b>                                                                  |     |                    |              |
|                                                                                                      | 140 |                    |              |
| Yes                                                                                                  |     | 3.33 (0.73, 15.28) | 0.12         |
| No                                                                                                   |     | 4.81 (0.82, 28.27) | 0.082        |
| N/A                                                                                                  |     | -reference-        |              |
| <b>PD Onset</b>                                                                                      |     |                    |              |
|                                                                                                      | 138 |                    |              |
| While I was still having regular periods                                                             |     | -reference-        |              |
| While I was going through perimenopause                                                              |     | 3.43 (0.79, 14.85) | 0.1          |
| One year or more after my last menstrual period                                                      |     | 0.76 (0.25, 2.33)  | 0.63         |
| <b>History of Surgeries</b>                                                                          |     |                    |              |
| Total hysterectomy (removal of uterus, cervix, ovaries, Fallopian tubes, and surrounding structures) | 141 | 3.30 (1.25, 8.68)  | <b>0.016</b> |
| Oophorectomy (surgical removal of one/unilateral or both/bilateral ovaries)                          | 141 | 0.36 (0.04, 2.92)  | 0.34         |
| Mastectomy                                                                                           | 141 | 1.06 (0.11, 9.87)  | 0.96         |
| Partial hysterectomy (just uterus)                                                                   | 141 | 0.15 (0.01, 2.91)  | 0.21         |
| <b>Types of Hormone Replacement Therapy</b>                                                          |     |                    |              |
| Estrogen                                                                                             | 141 | 2.13 (0.67, 6.74)  | 0.2          |
| Progesterone/Progestin                                                                               | 141 | 0.36 (0.02, 8.87)  | 0.53         |
| Estrogen and progesterone combination                                                                | 141 | 2.43 (0.82, 7.20)  | 0.11         |
| <b>Types of Birth Control</b>                                                                        |     |                    |              |
| Pill                                                                                                 | 141 | 1.11 (0.43, 2.89)  | 0.82         |
| Ring                                                                                                 | 141 | 1.42 (0.14, 14.24) | 0.76         |
| Hormonal IUD                                                                                         | 141 | 1.66 (0.41, 6.71)  | 0.48         |
| Copper IUD                                                                                           | 141 | 0.68 (0.14, 3.24)  | 0.63         |
| Tubal ligation                                                                                       | 141 | 0.97 (0.26, 3.68)  | 0.97         |
| <b>Pregnancy Experiences</b>                                                                         |     |                    |              |
| In vitro fertilization                                                                               | 141 | 0.45 (0.02, 12.03) | 0.63         |

|                                              |     |                     |       |
|----------------------------------------------|-----|---------------------|-------|
| C-section                                    | 141 | 1.34 (0.48, 3.75)   | 0.57  |
| Vaginal birth                                | 141 | 1.04 (0.43, 2.53)   | 0.93  |
| Having children prior to PD diagnosis        | 141 | 1.30 (0.45, 3.77)   | 0.63  |
| No children                                  | 141 | 0.59 (0.16, 2.14)   | 0.42  |
| <b>Difficulties in Pregnancy Experiences</b> |     |                     |       |
| Conceiving (fertility)                       | 141 | 0.63 (0.17, 2.29)   | 0.48  |
| Childbirth                                   | 141 | 0.46 (0.10, 2.11)   | 0.31  |
| Pregnancy (reaching full birth)              | 141 | 1.50 (0.49, 4.56)   | 0.47  |
| <b>Pregnancy-related Aliments</b>            |     |                     |       |
| Eclampsia or pre-eclampsia                   | 141 | 3.79 (0.94, 15.22)  | 0.06  |
| Diabetes during pregnancy                    | 141 | 1.42 (0.14, 14.24)  | 0.76  |
| Bacterial infection                          | 141 | 9.04 (0.79, 103.63) | 0.077 |
| Depression/anxiety during pregnancy          | 141 | 0.69 (0.08, 6.00)   | 0.74  |
| <i>Postpartum Depression</i>                 | 141 | 0.13 (0.01, 2.41)   | 0.17  |
| Flair up migraines                           | 141 | 0.93 (0.19, 4.59)   | 0.93  |
| <b>Hormone-related Disorders</b>             |     |                     |       |
| Polycystic Ovarian Syndrome                  | 141 | 0.84 (0.09, 7.49)   | 0.87  |
| Hypothyroidism                               | 141 | 0.63 (0.17, 2.29)   | 0.48  |
| <i>Hyperthyroidism</i>                       | 141 | 0.20 (0.01, 4.17)   | 0.3   |
| Diabetes Type II                             | 141 | 2.20 (0.38, 12.69)  | 0.38  |
| Migraines (no aura)                          | 141 | 2.68 (0.89, 8.04)   | 0.079 |

*Variables in italics:* use Firth method

Dummy variables for each response option

Reference was used to for univariate modeling and for the outcome of moderate/severe phenotype

Supplemental Table 1D. Part IV: Univariate Logistic Regression Results

|                                               | Sample Size | OR (95% CI)        | p-value |
|-----------------------------------------------|-------------|--------------------|---------|
| <b>Age</b>                                    |             |                    |         |
|                                               | 139         | 1.01 (0.97, 1.05)  | 0.64    |
| <b>Hispanic</b>                               |             |                    |         |
|                                               | 139         | 0.31 (0.01, 9.58)  | 0.5     |
| <b>White</b>                                  |             |                    |         |
|                                               | 139         | 2.31 (0.26, 20.37) | 0.45    |
| <b>Genetic Status</b>                         | 138         |                    |         |
| GBA                                           |             | 2.63 (0.40, 17.46) | 0.32    |
| LRRK2                                         |             | 3.00 (0.40, 22.71) | 0.29    |
| GBA                                           | 139         | 2.14 (0.72, 6.34)  | 0.17    |
| LRRK2                                         | 139         | 2.39 (0.66, 8.75)  | 0.19    |
| PRKN                                          | 139         | 1.12 (0.20, 6.37)  | 0.9     |
| None                                          |             | 1.15 (0.22, 6.00)  | 0.87    |
| Other                                         |             | -reference-        |         |
| <b>Medications</b>                            |             |                    |         |
| Levodopa                                      | 139         | 1.42 (0.52, 3.88)  | 0.49    |
| Entacapone                                    | 138         | 1.11 (0.10, 12.55) | 0.93    |
| Carbidopa, Levodopa, and Entacapone (Stalevo) | 137         | 2.38 (0.72, 7.86)  | 0.16    |
| Pramipexole                                   | 137         | 1.11 (0.41, 2.99)  | 0.83    |
| Ropinirole                                    | 137         | 1.93 (0.56, 6.71)  | 0.3     |

|                               |     |                    |       |
|-------------------------------|-----|--------------------|-------|
| Rotigotine                    | 137 | 4.72 (0.83, 26.83) | 0.08  |
| Rasagiline                    | 137 | 0.82 (0.34, 1.95)  | 0.65  |
| Selegiline (oral, sublingual) | 138 | 1.11 (0.10, 12.55) | 0.93  |
| Amantadine (liquid, infusion) | 137 | 2.46 (0.85, 7.06)  | 0.095 |

---

**Current Comorbidities**

|                                          |     |                    |              |
|------------------------------------------|-----|--------------------|--------------|
| Arrhythmia/Atrial Fibrillation           | 139 | 0.89 (0.17, 4.77)  | 0.89         |
| Arthritis                                | 139 | 0.93 (0.45, 1.92)  | 0.85         |
| B12 deficiency                           | 139 | 2.91 (0.98, 8.62)  | 0.054        |
| Cancer                                   | 139 | 0.43 (0.05, 3.83)  | 0.45         |
| Depression                               | 139 | 2.42 (1.12, 5.23)  | <b>0.024</b> |
| Diabetes Mellitus (adult onset)          | 139 | 0.43 (0.05, 3.83)  | 0.45         |
| Hearing Loss                             | 139 | 1.02 (0.43, 2.39)  | 0.96         |
| Hyper cholesterolemia (High Cholesterol) | 139 | 0.79 (0.35, 1.79)  | 0.58         |
| Hypertension (High Blood Pressure)       | 139 | 0.87 (0.35, 2.16)  | 0.76         |
| Loss of smell                            | 139 | 2.21 (1.07, 4.61)  | <b>0.033</b> |
| Lung disease (including emphysema)       | 139 | 1.97 (0.57, 6.86)  | 0.28         |
| Other                                    | 139 | 1.25 (0.59, 2.62)  | 0.56         |
| Peripheral neuropathy                    | 139 | 1.02 (0.33, 3.13)  | 0.98         |
| PTSD                                     | 139 | 4.08 (0.93, 17.92) | 0.063        |
| Recreational drug use                    | 139 | 0.62 (0.12, 3.12)  | 0.56         |

|                                                           |     |                    |              |
|-----------------------------------------------------------|-----|--------------------|--------------|
| Renal insufficiency (kidney disease)                      | 139 | 2.29 (0.31, 16.84) | 0.41         |
| Thyroid disease (not cancer, including Grave's disease)   | 139 | 0.95 (0.39, 2.28)  | 0.9          |
| <b>Still Menstruating Variable</b>                        |     |                    |              |
|                                                           | 139 | 0.18 (0.02, 1.47)  | 0.11         |
| <b>Diagnosis of PMS Variable</b>                          |     |                    |              |
|                                                           | 139 | 2.43 (0.74, 8.03)  | 0.14         |
| <b>Currently Perimenopausal Variable</b>                  |     |                    |              |
|                                                           | 136 | 0.62 (0.12, 3.13)  | 0.56         |
| <b>Hormone Levels Checked for Perimenopausal Variable</b> |     |                    |              |
|                                                           | 9   | 0.75 (0.03, 17.51) | 0.86         |
| <b>Have Experienced Menopause Variable</b>                |     |                    |              |
|                                                           | 136 | 1.52 (0.47, 4.99)  | 0.49         |
| <b>Menses and PD Medication</b>                           |     |                    |              |
| Medication felt less effective                            | 139 | 9.74 (1.06, 89.96) | <b>0.045</b> |
| More off/irregular frequency periods                      | 139 | 4.82 (0.85, 27.41) | 0.076        |
| <b>Hormone Replacement Therapy Variable</b>               |     |                    |              |
|                                                           | 132 | 0.57 (0.24, 1.35)  | 0.2          |
| <b>Birth Control Variable</b>                             |     |                    |              |
|                                                           | 96  | 0.69 (0.07, 6.90)  | 0.75         |
| <b>Experience of Breast Feeding</b>                       |     |                    |              |
| Yes                                                       | 138 | 1.36 (0.49, 3.78)  | 0.55         |
| No                                                        |     | 2.59 (0.73, 9.25)  | 0.14         |
| N/A                                                       |     | -reference-        |              |

|                                                                                                      |     |                    |      |
|------------------------------------------------------------------------------------------------------|-----|--------------------|------|
| <b>PD Onset</b>                                                                                      | 136 |                    |      |
| While I was still having regular periods                                                             |     | -reference-        |      |
| While I was going through perimenopause                                                              |     | 1.94 (0.50, 7.64)  | 0.34 |
| One year or more after my last menstrual period                                                      |     | 0.63 (0.25, 1.60)  | 0.33 |
| <b>History of Surgeries</b>                                                                          |     |                    |      |
| Total hysterectomy (removal of uterus, cervix, ovaries, Fallopian tubes, and surrounding structures) | 139 | 0.97 (0.37, 2.57)  | 0.95 |
| Oophorectomy (surgical removal of one/unilateral or both/bilateral ovaries)                          | 139 | 2.43 (0.74, 8.03)  | 0.14 |
| Mastectomy                                                                                           | 139 | 3.52 (0.57, 21.91) | 0.18 |
| Partial hysterectomy (just uterus)                                                                   | 139 | 0.99 (0.29, 3.42)  | 0.99 |
| <b>Types of Hormone Replacement Therapy</b>                                                          |     |                    |      |
| Estrogen                                                                                             | 139 | 1.02 (0.33, 3.13)  | 0.98 |
| <i>Progesterone/Progestin</i>                                                                        | 139 | 0.19 (0.01, 4.66)  | 0.31 |
| Estrogen and progesterone combination                                                                | 139 | 0.84 (0.28, 2.53)  | 0.76 |
| <b>Types of Birth Control</b>                                                                        |     |                    |      |
| Pill                                                                                                 | 139 | 1.17 (0.53, 2.60)  | 0.69 |
| <i>Ring</i>                                                                                          | 139 | 0.24 (0.01, 6.32)  | 0.39 |
| Hormonal IUD                                                                                         | 139 | 0.83 (0.21, 3.27)  | 0.78 |
| Copper IUD                                                                                           | 139 | 2.47 (0.81, 7.55)  | 0.11 |
| Tubal ligation                                                                                       | 139 | 1.77 (0.65, 4.76)  | 0.26 |
| <b>Pregnancy Experiences</b>                                                                         |     |                    |      |
| In vitro fertilization                                                                               | 139 | 1.12 (0.10, 12.68) | 0.93 |
| C-section                                                                                            | 139 | 0.66 (0.24, 1.78)  | 0.41 |



|                                              |     |                      |              |
|----------------------------------------------|-----|----------------------|--------------|
| Vaginal birth                                | 139 | 1.35 (0.62, 2.98)    | 0.45         |
| Having children prior to PD diagnosis        | 139 | 2.17 (0.82, 5.76)    | 0.12         |
| No children                                  | 139 | 0.75 (0.27, 2.07)    | 0.58         |
| <b>Difficulties in Pregnancy Experiences</b> |     |                      |              |
| Conceiving (fertility)                       | 139 | 1.04 (0.37, 2.94)    | 0.95         |
| Childbirth                                   | 139 | 1.04 (0.37, 2.94)    | 0.95         |
| Pregnancy (reaching full birth)              | 139 | 1.60 (0.60, 4.25)    | 0.35         |
| <b>Pregnancy-related Aliments</b>            |     |                      |              |
| Eclampsia or pre-eclampsia                   | 139 | 3.18 (0.68, 14.87)   | 0.14         |
| Diabetes during pregnancy                    | 139 | 9.74 (1.06, 89.96)   | <b>0.045</b> |
| <i>Viral infection</i>                       | 139 | 6.72 (0.07, 620.49)  | 0.41         |
| Bacterial infection                          | 139 | 12.49 (1.41, 110.45) | <b>0.023</b> |
| Depression/anxiety during pregnancy          | 139 | 1.73 (0.37, 8.07)    | 0.49         |
| Postpartum Depression                        | 139 | 0.58 (0.15, 2.19)    | 0.42         |
| Flair up migraines                           | 139 | 5.03 (1.19, 21.16)   | <b>0.028</b> |
| <b>Hormone-related Disorders</b>             |     |                      |              |
| Polycystic Ovarian Syndrome                  | 139 | 1.73 (0.37, 8.07)    | 0.49         |
| Hypothyroidism                               | 139 | 0.90 (0.34, 2.37)    | 0.84         |
| Hyperthyroidism                              | 139 | 1.13 (0.27, 4.72)    | 0.87         |
| <i>Diabetes Type II</i>                      | 139 | 0.16 (0.01, 3.65)    | 0.25         |
| Migraines (no aura)                          | 139 | 0.84 (0.28, 2.53)    | 0.76         |

*Variables in italics:* use Firth method

Dummy variables for each response option

Reference was used to for univariate modeling and for the outcome of moderate/severe phenotype

**Supplemental Table 2: List of Comorbidities**

| Variable | Label                                                                     | Type | Length | Codes                                                                                          | Format name |
|----------|---------------------------------------------------------------------------|------|--------|------------------------------------------------------------------------------------------------|-------------|
| SUBJCAP  |                                                                           | Char | 8      |                                                                                                |             |
| COMORBID | Have you ever been diagnosed with or treated for any of these conditions? | Char | 12     | 1 = a) Hypertension (High Blood Pressure)                                                      | COMORBID    |
|          |                                                                           |      |        | 2 = b) Diabetes Mellitus (childhood onset)                                                     | COMORBID    |
|          |                                                                           |      |        | 3 = c) Diabetes Mellitus (adult onset)                                                         | COMORBID    |
|          |                                                                           |      |        | 4 = d) Myocardial Infarction (Heart Attack)                                                    | COMORBID    |
|          |                                                                           |      |        | 5 = e) Congestive Heart Failure                                                                | COMORBID    |
|          |                                                                           |      |        | 6 = f) Arrythmia/Atrial Fibrillation                                                           | COMORBID    |
|          |                                                                           |      |        | 7 = g) Hyper cholesterolemia (High Cholesterol)                                                | COMORBID    |
|          |                                                                           |      |        | 8 = h) Hearing Loss                                                                            | COMORBID    |
|          |                                                                           |      |        | 9 = i) Loss of smell                                                                           | COMORBID    |
|          |                                                                           |      |        | 10 = j) Lung disease (including emphysema)                                                     | COMORBID    |
|          |                                                                           |      |        | 11 = k) Thyroid disease (not cancer; including Grave's disease)                                | COMORBID    |
|          |                                                                           |      |        | 12 = l) Liver                                                                                  | COMORBID    |
|          |                                                                           |      |        | 13 = m) Renal insufficiency (kidney disease)                                                   | COMORBID    |
|          |                                                                           |      |        | 14 = n) Peptic ulcer disease                                                                   | COMORBID    |
|          |                                                                           |      |        | 15 = o) Peripheral vascular disease                                                            | COMORBID    |
|          |                                                                           |      |        | 16 = p) Stroke, mini stroke, CVA (cerebrovascular accident) or TIA (transient ischemic attack) | COMORBID    |
|          |                                                                           |      |        | 17 = q) Seizure, fit , convulsion or unexplained loss of consciousness                         | COMORBID    |
|          |                                                                           |      |        | 18 = r) Arthritis                                                                              | COMORBID    |
|          |                                                                           |      |        | 19 = s) Hip Fracture                                                                           | COMORBID    |
|          |                                                                           |      |        | 20 = t) Gout                                                                                   | COMORBID    |
|          |                                                                           |      |        | 21 = u) Recreational drug use                                                                  | COMORBID    |
|          |                                                                           |      |        | 22 = v) Gaucher disease                                                                        | COMORBID    |
|          |                                                                           |      |        | 23 = w) Multiple sclerosis                                                                     | COMORBID    |
|          |                                                                           |      |        | 24 = x) Alzheimer's disease                                                                    | COMORBID    |
|          |                                                                           |      |        | 25 = y) ALS                                                                                    | COMORBID    |
|          |                                                                           |      |        | 26 = z) PTSD                                                                                   | COMORBID    |
|          |                                                                           |      |        | 27 = aa) Depression                                                                            | COMORBID    |
|          |                                                                           |      |        | 28 = bb) Normal pressure hydrocephalus                                                         | COMORBID    |
|          |                                                                           |      |        | 29 = cc) Peripheral neuropathy                                                                 | COMORBID    |
|          |                                                                           |      |        | 30 = dd) Crohn's disease/ulcerative colitis                                                    | COMORBID    |
|          |                                                                           |      |        | 31 = ee) B12 deficiency                                                                        | COMORBID    |
|          |                                                                           |      |        | 32 = ff) Cancer, if yes please specify:                                                        | COMORBID    |

**Supplemental Table 2: List of Comorbidities**

| Variable | Label                              | Type | Length | Codes                                  | Format name |
|----------|------------------------------------|------|--------|----------------------------------------|-------------|
|          |                                    |      |        | 33 = gg) Other, if yes please specify: | COMORBID    |
| CURRENT  | Current Diagnosis                  | Num  | 8      | 0 = No                                 | YN          |
|          |                                    |      |        | 1 = Yes                                | YN          |
| LIFETIME | Lifetime Diagnosis                 | Num  | 8      | 0 = No                                 | YN          |
|          |                                    |      |        | 1 = Yes                                | YN          |
| CANCERNM | Cancer, specify                    | Char | 51     |                                        |             |
| OTHERNM  | Other Medical Problems             | Char | 40     |                                        |             |
| C_BRAIN  | Did you ever have a brain surgery? | Num  | 8      | 0 = No                                 | YNUNK       |
|          |                                    |      |        | 1 = Yes                                | YNUNK       |
|          |                                    |      |        | 9 = Unknown                            | YNUNK       |

**Supplemental Table 3. Frequency of UPDRS Scores, by Severity Groups Parts I-IV**

|                                 | <b>Part I</b> | <b>Part II</b> | <b>Part III</b> | <b>Part IV</b> |
|---------------------------------|---------------|----------------|-----------------|----------------|
| UPDRS Moderate/Severe Threshold | >21           | >29            | >58             | >12            |
| Mild n (%)                      | 112 (70.0)    | 246 (81.46)    | 114 (80.85)     | 96 (69.06)     |
| Moderate/Severe n (%)           | 48 (30.0)     | 56 (18.54)     | 27 (19.15)      | 40 (30.94)     |
